# Supplementary material
Source: HighWire-hosted journal article supplement (https://bmjopen.bmj.com/content/6/12/e012413)
Supplement: inline-supplementary-material-1 [file inline-supplementary-material-1.pdf]

### Subqueries based on ICD9CM codes

| Name of the subquery | Description                 | Code   | Italian label of code                                                                | Translation of the Italian label                                                       |
|----------------------|-----------------------------|--------|--------------------------------------------------------------------------------------|----------------------------------------------------------------------------------------|
| (AMI)                | Acute myocardial infarction | 410    | Infarto miocardico acuto. Infarto, rottura del cuore, del miocardio, del ventricolo. | Acute myocardial infarction. Infarction, rupture of heart, myocardium, ventricle       |
|                      |                             | 410.0  | Infarto miocardico acuto parete anterolaterale                                       | Acute myocardial infarction of anterolateral wall                                      |
|                      |                             | 410.00 | Infarto miocardico acuto parete anterolaterale                                       | Acute myocardial infarction of anterolateral wall                                      |
|                      |                             | 410.01 | Infarto miocardico acuto parete anterolaterale, assistenza iniziale                  | Acute myocardial infarction of anterolateral wall, episode of initial care             |
|                      |                             | 410.02 | Infarto miocardico acuto parete anterolaterale, assistenza successiva                | Acute myocardial infarction of anterolateral wall, episode of subsequent care          |
|                      |                             | 410.1  | Infarto miocardico acuto altra parte parete anteriore                                | Acute myocardial infarction of other part of anterior wall                             |
|                      |                             | 410.1  | Infarto miocardico parete anteriore e porzione setto interventricolare               | Acute myocardial infarction of anterior wall and part of interventricular septum       |
|                      |                             | 410.1  | Infarto miocardico anteroapicale e porzione setto interventricolare                  | Anteroapical myocardial infarction and part of interventricular septum                 |
|                      |                             | 410.1  | Infarto miocardico anteroseptale e porzione setto interventricolare                  | Anteroseptal myocardial infarction and part of interventricular septum                 |
|                      |                             | 410.10 | Infarto miocardico acuto altra parte parete anteriore                                | Acute myocardial infarction of other part of anterior wall                             |
|                      |                             | 410.11 | Infarto miocardico acuto altra parte parete anteriore, assistenza iniziale           | Acute myocardial infarction of other part of anterior wall, episode of initial care    |
|                      |                             | 410.12 | Infarto miocardico acuto altra parte parete anteriore, assistenza successiva         | Acute myocardial infarction of other part of anterior wall, episode of subsequent care |
|                      |                             | 410.2  | Infarto miocardico acuto parete inferolaterale                                       | Acute myocardial infarction of inferolateral wall                                      |
|                      |                             | 410.20 | Infarto miocardico acuto parete inferolaterale                                       | Acute myocardial infarction of inferolateral wall                                      |
|                      |                             | 410.21 | Infarto miocardico acuto parete inferolaterale, assistenza iniziale                  | Acute myocardial infarction of inferolateral wall, episode of initial care             |
|                      |                             | 410.22 | Infarto miocardico acuto parete inferolaterale, assistenza successiva                | Acute myocardial infarction of inferolateral wall, subsequent of initial care          |
|                      |                             | 410.3  | Infarto miocardico acuto parete inferoposteriore                                     | Acute myocardial infarction of inferoposterior wall                                    |

|  |  |        |                                                                              |                                                                                        |
|--|--|--------|------------------------------------------------------------------------------|----------------------------------------------------------------------------------------|
|  |  | 410.30 | Infarto miocardico acuto parete inferoposteriore                             | Acute myocardial infarction of inferoposterior wall                                    |
|  |  | 410.31 | Infarto miocardico acuto parete inferoposteriore, assistenza iniziale        | Acute myocardial infarction of inferoposterior wall, episode of initial care           |
|  |  | 410.32 | Infarto miocardico acuto parete inferoposteriore, assistenza successiva      | Acute myocardial infarction of inferoposterior wall, episode of subsequent care        |
|  |  | 410.4  | Infarto miocardico acuto altra parte parete inferiore                        | Acute myocardial infarction of other part of the inferior wall                         |
|  |  | 410.4  | Infarto miocardico parete diaframmatica e porzione setto interventricolare   | Myocardial infarction of diaphragmatic wall and part of intrventricular septum         |
|  |  | 410.4  | Infarto miocardico parete inferiore e porzione setto interventricolare       | Myocardial infarction of inferior wall and part of interventricular septum             |
|  |  | 410.40 | Infarto miocardico acuto altra parte parete inferiore                        | Acute myocardial infarction of other part of inferior wall                             |
|  |  | 410.41 | Infarto miocardico acuto altra parte parete inferiore, assistenza iniziale   | Acute myocardial infarction of other part of inferior wall, initial episode of care    |
|  |  | 410.42 | Infarto miocardico acuto altra parte parete inferiore, assistenza successiva | Acute myocardial infarction of other part of inferior wall, subsequent episode of care |
|  |  | 410.5  | Infarto miocardico laterale alto                                             | Myocardial infarction of high lateral wall                                             |
|  |  | 410.5  | Infarto miocardico latero-apicale                                            | Myocardial infarction of lateral-apical wall                                           |
|  |  | 410.5  | Infarto miocardico acuto altra parte parete laterale                         | Acute myocardial infarction of other part of lateral wall                              |
|  |  | 410.5  | Infarto miocardico latero-basale                                             | Myocardial infarction of basal-lateral wall                                            |
|  |  | 410.5  | Infarto miocardico posterolaterale                                           | Myocardial infarction of postero-lateral wall                                          |
|  |  | 410.50 | Infarto miocardico acuto altra parte parete laterale                         | Acute myocardial infarction of other part of lateral wall                              |
|  |  | 410.51 | Infarto miocardico acuto altra parte parete laterale, assistenza iniziale    | Acute myocardial infarction of other part of lateral wall, initial episode of care     |
|  |  | 410.52 | Infarto miocardico acuto altra parte parete laterale, assistenza successiva  | Acute myocardial infarction of other part of lateral wall, subsequent episode of care  |
|  |  | 410.6  | Infarto vero parete posteriore                                               | True posterior wall infarction                                                         |
|  |  | 410.6  | Infarto miocardico posterobasale                                             | Myocardial infarction of posterobasal wall                                             |

|  |  |        |                                                                        |                                                                                  |
|--|--|--------|------------------------------------------------------------------------|----------------------------------------------------------------------------------|
|  |  | 410.6  | Infarto miocardico esattamente posteriore                              | Myocardial infarction of posterior wall only                                     |
|  |  | 410.60 | Infarto strettamente posteriore                                        | True posterior wall infarction                                                   |
|  |  | 410.61 | Infarto strettamente posteriore, assistenza iniziale                   | True posterior wall infarction, initial episode of care                          |
|  |  | 410.62 | Infarto strettamente posteriore, assistenza successiva                 | True posterior wall infarction, subsequent episode of care                       |
|  |  | 410.7  | Infarto subendocardico                                                 | Subendocardic infarction                                                         |
|  |  | 410.7  | Infarto non transmurale                                                | Nontransmural infarction                                                         |
|  |  | 410.7  | Infarto non Q                                                          | Non-Q-wave infarction                                                            |
|  |  | 410.70 | Infarto subendocardico                                                 | Subendocardial infarction                                                        |
|  |  | 410.71 | Infarto subendocardico, assistenza iniziale                            | Subendocardial infarction, initial episode of care                               |
|  |  | 410.72 | Infarto subendocardico, assistenza successiva                          | Subendocardial infarction, subsequent episode of care                            |
|  |  | 410.8  | Infarto miocardico strettamente settale                                | True septal myocardial infarction                                                |
|  |  | 410.8  | Infarto miocardico acuto altre sedi specificate                        | Acute myocardial infarction in other specified sites                             |
|  |  | 410.8  | Infarto miocardico atrio                                               | Atrial myocardial infarction                                                     |
|  |  | 410.8  | Infarto miocardico muscolo papillare                                   | Myocardial infarction of papillary muscle                                        |
|  |  | 410.80 | Infarto miocardico acuto altre sedi specificate                        | Acute myocardial infarction of other specified sites                             |
|  |  | 410.81 | Infarto miocardico acuto altre sedi specificate, assistenza iniziale   | Acute myocardial infarction of other specified sites, initial episode of care    |
|  |  | 410.82 | Infarto miocardico acuto altre sedi specificate, assistenza successiva | Acute myocardial infarction of other specified sites, subsequent episode of care |
|  |  | 410.9  | Infarto miocardico acuto                                               | Acute myocardial infarction                                                      |
|  |  | 410.9  | Occlusione coronarica                                                  | Coronary occlusion                                                               |
|  |  | 410.9  | Infarto miocardico silente                                             | Silent myocardial infarction                                                     |
|  |  | 410.90 | Infarto miocardico acuto                                               | Acute myocardial infarction                                                      |
|  |  | 410.91 | Infarto miocardico acuto, assistenza iniziale                          | Acute myocardial infarction, initial episode of care                             |

|                                |                              |        |                                                                                                                     |                                                                                                      |
|--------------------------------|------------------------------|--------|---------------------------------------------------------------------------------------------------------------------|------------------------------------------------------------------------------------------------------|
|                                |                              | 410.92 | Infarto miocardico acuto assistenza successiva                                                                      | Acute myocardial infarction, subsequent episode of care                                              |
| (AORTIC ANEURYSM)              | Aortic aneurysm              | 441.0  | Dissezione aorta                                                                                                    | Dissection of aorta                                                                                  |
|                                |                              | 441.00 | Dissezione aorta                                                                                                    | Dissection of aorta                                                                                  |
|                                |                              | 441.01 | Dissezione aorta, toracica                                                                                          | Dissection of aorta, thoracic                                                                        |
|                                |                              | 441.02 | Dissezione aorta, addominale                                                                                        | Dissection of aorta, abdominal                                                                       |
|                                |                              | 441.03 | Dissezione aorta toracoaddominale                                                                                   | Dissection of thoracoabdominal aorta                                                                 |
|                                |                              | 441.1  | Rottura aneurisma toracico                                                                                          | Rupture of thoracic aneurysm                                                                         |
|                                |                              | 441.2  | Aneurisma toracico senza rottura                                                                                    | Thoracic aneurysm without rupture                                                                    |
|                                |                              | 441.3  | Rottura aneurisma addominale                                                                                        | Rupture of abdominal aneurysm                                                                        |
|                                |                              | 441.4  | Aneurisma addominale senza rottura                                                                                  | Abdominal aneurysm without rupture                                                                   |
|                                |                              | 441.4  | Aneurisma addominale                                                                                                | Abdominal aneurysm                                                                                   |
|                                |                              | 441.5  | Rottura aneurisma aortico                                                                                           | Rupture of aortic aneurysm                                                                           |
|                                |                              | 441.5  | Rottura aorta                                                                                                       | Aortic rupture                                                                                       |
|                                |                              | 441.6  | Rottura aneurisma toracoaddominale                                                                                  | Rupture of thoracoabdominal aneurysm                                                                 |
|                                |                              | 441.7  | Aneurisma toracoaddominale senza rottura                                                                            | Thoracoabdominal aneurysm, without rupture                                                           |
|                                |                              | 441.9  | Aneurisma aortico                                                                                                   | Aortic aneurysm                                                                                      |
|                                |                              | 441.9  | Aneurisma aorta                                                                                                     | Aneurysm of aorta                                                                                    |
|                                |                              | 441.9  | Dilatazione aorta                                                                                                   | Dilation of aorta                                                                                    |
| (ATHEROSCLEROTIC ARTERIOPATHY) | Atherosclerotic arteriopathy | 440    | Aterosclerosi. Arteriosclerosi. Ateroma. Degenerazione arterie, arteriovascolare, vascolare. Endarterite deformante | Atherosclerosis. Atheroma. Arterial, arteriovascular, vascular degeneration. Deformingt endarteritis |
|                                |                              | 440.0  | Aterosclerosi aorta                                                                                                 | Atherosclerosis of aorta                                                                             |
|                                |                              | 440.1  | Aterosclerosi arterie renali                                                                                        | Atherosclerosis of renal arteries                                                                    |
|                                |                              | 440.2  | Aterosclerosi arti                                                                                                  | Atherosclerosis of extremities                                                                       |
|                                |                              | 440.20 | Aterosclerosi arti inferiori                                                                                        | Lower extremity atherosclerosis                                                                      |

|                              |                         |        |                                                                  |                                                                             |
|------------------------------|-------------------------|--------|------------------------------------------------------------------|-----------------------------------------------------------------------------|
|                              |                         | 440.20 | Ateriopatia arti inferiori                                       | Lower extremity atheropathy                                                 |
|                              |                         | 440.21 | Aterosclerosi arti con claudicazione intermittente               | Atherosclerosis of the extremities with intermittent claudication           |
|                              |                         | 440.22 | Aterosclerosi arti con dolore a riposo                           | Atherosclerosis of the extremities with rest pain                           |
|                              |                         | 440.23 | Aterosclerosi arti con ulcerazioni                               | Atherosclerosis of the extremities with ulcerations                         |
|                              |                         | 440.24 | Aterosclerosi arti con gangrena                                  | Atherosclerosis of the extremities with gangrene                            |
|                              |                         | 440.29 | Altre aterosclerosi arti                                         | Other atherosclerosis of the extremities                                    |
|                              |                         | 440.3  | Aterosclerosi innesto vascolare degli arti                       | Atherosclerosis of vascular bypass graft of the extremities                 |
|                              |                         | 440.30 | Aterosclerosi innesto degli arti                                 | Atherosclerosis of bypass graft of the extremities                          |
|                              |                         | 440.31 | Aterosclerosi innesto venoso autologo degli arti                 | Atherosclerosis of autologous vein bypass graft of the extremities          |
|                              |                         | 440.32 | Aterosclerosi innesto vascolare naturale non autologo degli arti | Atherosclerosis of nonautologous biological bypass graft of the extremities |
|                              |                         | 440.8  | Aterosclerosi altre arterie specificate                          | Atherosclerosis of other specified arteries                                 |
|                              |                         | 440.9  | Aterosclerosi generalizzata                                      | Generalized atherosclerosis                                                 |
|                              |                         | 440.9  | Malattia arteriosclerosi vascolare                               | Vascular arteriosclerotic disease                                           |
|                              |                         | 440.9  | Arteriosclerosi                                                  | Arteriosclerosis                                                            |
|                              |                         | 440.9  | Ateroma                                                          | Atheroma                                                                    |
|                              |                         | 440.9  | Arterite senile                                                  | Senile arteritis                                                            |
|                              |                         | 440.9  | Aterosclerosi polidistrettuale                                   | Multi-site atherosclerosis                                                  |
| (CAROTID<br>ATHEROSCLEROSIS) | Carotid Atherosclerosis | 433.1  | Stenosi carotide                                                 | Stenosis of carotid artery                                                  |
|                              |                         | 433.10 | Occlusione e stenosi carotide senza infarto cerebrale            | Occlusion and stenosis of carotid artery without cerebral infarction        |
|                              |                         | 433.10 | Stenosi carotide bilaterale                                      | Bilateral stenosis of carotid arteries                                      |
|                              |                         | 433.10 | Stenosi carotide dx                                              | Stenosis of the right carotid artery                                        |
|                              |                         | 433.10 | Stenosi carotide sx                                              | Stenosis of the left carotid artery                                         |
| (CHD NO AMI)                 | Coronary heart disease  | 411.1  | Sindrome coronarica intermedia                                   | Intermediate coronary syndrome                                              |

|       |                |                |                                                         |                                                                |
|-------|----------------|----------------|---------------------------------------------------------|----------------------------------------------------------------|
|       | without AMI    | 411.1          | Angina pre-infartuale                                   | Preinfarction angina                                           |
|       |                | 411.1          | Angina instabile                                        | Instable angina                                                |
|       |                | 411.1          | Infarto incombente                                      | Imminent infarction                                            |
|       |                | 411.1          | Sindrome pre-infartuale                                 | Preinfarction syndrome                                         |
|       |                | 411.8          | Forme diverse, acute e subacute, cardiopatia ischemica  | Different forms, acute and subacute, of ischemic heart disease |
|       |                | 411.81         | Occlusione coronarica senza infarto miocardico          | Coronary occlusion without myocardial infarction               |
|       |                | 411.81         | embolia coronarie                                       | Coronary embolism                                              |
|       |                | 411.81         | occlusione coronarie                                    | Coronary occlusion                                             |
|       |                | 411.81         | trombosi coronarie                                      | Coronary thrombosis                                            |
|       |                | 411.89         | Ulteriori forme, acute e subacute cardiopatia ischemica | Other forms acute and subacute ischemic heart disease          |
|       |                | 411.89         | Insufficienza coronarica acuta                          | Acute coronary insufficiency                                   |
|       |                | 411.89         | Ischemia sub endocardica                                | Subendocardial ischemia                                        |
|       |                | 413            | Angina pectoris                                         | Angina pectoris                                                |
|       |                | 413.0          | Angina da decubito                                      | Angina decubitus                                               |
|       |                | 413.0          | Angina notturna                                         | Nocturnal angina                                               |
|       |                | 413.1          | Angina Prinzmetal                                       | Prinzmetal angina                                              |
|       |                | 413.1          | Angina pectoris variante                                | Variant angina                                                 |
|       |                | 413.9          | Sindrome anginosa                                       | Anginal syndrome                                               |
|       |                | 413.9          | Angina da sforzo                                        | Effort angina                                                  |
|       |                | 413.9          | Altre forme angina pectoris                             | Other forms of angina pectoris                                 |
|       |                | 413.9          | Angina pectoris                                         | Angina pectoris                                                |
|       |                | 413.9          | Angina cardiaca                                         | Angina pectoris                                                |
| 413.9 | Stato anginoso | Anginal status |                                                         |                                                                |

|       |                        |        |                                                     |                                                           |
|-------|------------------------|--------|-----------------------------------------------------|-----------------------------------------------------------|
|       |                        | 413.9  | Stenocardia                                         | Stenocardia                                               |
|       |                        | 413.9  | Sincope anginosa                                    | Anginal syndrome                                          |
|       |                        | 413.9  | Angina pectoris)                                    | Angina pectoris                                           |
|       |                        | 414    | Altre forme di cardiopatia ischemica cronica        | Other forms of chronic ischemic heart disease             |
|       |                        | 414.0  | Aterosclerosi coronarica                            | Coronary atherosclerosis                                  |
|       |                        | 414.0  | Cardiopatia arteriosclerotica                       | Arteriosclerotic heart disease                            |
|       |                        | 414.0  | Cardiopatia aterosclerotica                         | Atherosclerotic heart disease                             |
|       |                        | 414.0  | arteriosclerosi coronarie                           | Arteriosclerosis of coronary arteries                     |
|       |                        | 414.0  | arterite o endoarterite coronarie                   | Arteritis or andarteritis of coronary arteries            |
|       |                        | 414.0  | ateroma coronarie                                   | Coronary atheroma                                         |
|       |                        | 414.0  | sclerosi coronarie                                  | Coronary sclerosis                                        |
|       |                        | 414.0  | stenosi coronarie                                   | Coronary stenosis                                         |
|       |                        | 414.00 | Aterosclerosi coronarica                            | Coronary atherosclerosis                                  |
|       |                        | 414.01 | Aterosclerosi coronarica arteria coronarica nativa) | Coronary atherosclerosis of native coronary artery        |
| (CHD) | Coronary heart disease | 41411  | Aneurisma vasi coronarici                           | Aneurysm of coronary vessels                              |
|       |                        | 41412  |                                                     | Dissection of coronary artery                             |
|       |                        | 41419  | Altro aneurisma cardiaco                            | Other aneurysm of heart                                   |
|       |                        | 4142   |                                                     | Chronic total occlusion of coronary artery                |
|       |                        | 4143   |                                                     | Coronary atherosclerosis due to lipid rich plaque         |
|       |                        | 4144   |                                                     | Coronary atherosclerosis due to calcified coronary lesion |
|       |                        | 4148   | Insufficienza coronarica cronica                    | Chronic coronary insufficiency                            |
|       |                        | 4149   | Cardiopatia ischemica cronica                       | Chronic ischemic heart disease                            |
|       |                        | V45.81 | Bypass aorto-coronarico                             | Aortocoronary bypass status                               |

|                                     |                            |        |                                                                                      |                                                                                  |
|-------------------------------------|----------------------------|--------|--------------------------------------------------------------------------------------|----------------------------------------------------------------------------------|
|                                     |                            | V45.82 | Presenza angioplastica coronarica percutanea transluminale                           | Percutaneous transluminal coronary angioplasty status                            |
|                                     |                            | V45.82 | Angioplastica coronarica                                                             | Coronary angioplasty status                                                      |
| (CHRONIC KIDNEY DISEASE)            | Chronic kidney disease     | 583.81 | Nefropatia incipiente (microalbuminuria 30-300/24h)                                  | Incipient nephropathy (microalbuminuria 30-300/24h)                              |
|                                     |                            | 583.81 | Nefropatia conclamata                                                                | Frank nephropathy (microalbuminuria >300/24h)                                    |
|                                     |                            | 593.6  | Proteinuria posturale benigna                                                        | Benign postural proteinuria                                                      |
|                                     |                            | 593.6  | Proteinuria posturale                                                                | Postural proteinuria                                                             |
|                                     |                            | 593.6  | Proteinuria in ortostatismo                                                          | Orthostatic proteinuria                                                          |
|                                     |                            | 791.0  | Albuminuria                                                                          | Albuminuria                                                                      |
|                                     |                            | 791.0  | Proteinuria                                                                          | Proteinuria                                                                      |
|                                     |                            | 791.0  | Proteinuria Bence-Jones                                                              | Bence-Jones proteinuria                                                          |
| (CORONARY REVASCULARIZATION ICD9CM) | Coronary revascularization | 414.02 | Aterosclerosi coronarica bypass venoso autologo                                      | Coronary atherosclerosis of autologous vein bypass graft                         |
|                                     |                            | 414.03 | Aterosclerosi coronarica bypass biologico non autologo                               | Coronary atherosclerosis of nonautologous biological bypass graft                |
|                                     |                            | 414.04 | Aterosclerosi coronarica bypass arterioso                                            | Coronary atherosclerosis of artery bypass graft                                  |
|                                     |                            | 414.05 | Aterosclerosi coronarica bypass                                                      | Coronary atherosclerosis of bypass graft                                         |
|                                     |                            | 414.05 | Bypass coronaria                                                                     | Coronary artery bypass graft                                                     |
|                                     |                            | V45.81 | Bypass aorto-coronarico                                                              | Aortocoronary bypass status                                                      |
|                                     |                            | V45.82 | Angioplastica coronarica                                                             | Coronary angioplasty status                                                      |
|                                     |                            | V45.82 | Presenza angioplastica coronarica percutanea transluminale                           | Percutaneous transluminal coronary angioplasty status                            |
| (CVD)                               | Cardiovascular disease     | 410    | Infarto miocardico acuto. Infarto, rottura del cuore, del miocardio, del ventricolo. | Acute myocardial infarction. Infarction, rupture of heart, myocardium, ventricle |
|                                     |                            | 410.0  | Infarto miocardico acuto parete anterolaterale                                       | Acute myocardial infarction of anterolateral wall                                |
|                                     |                            | 410.00 | Infarto miocardico acuto parete anterolaterale                                       | Acute myocardial infarction of anterolateral wall                                |
|                                     |                            | 410.01 | Infarto miocardico acuto parete anterolaterale, assistenza iniziale                  | Acute myocardial infarction of anterolateral wall, episode of initial care       |



|  |  |        |                                                                              |                                                                                        |
|--|--|--------|------------------------------------------------------------------------------|----------------------------------------------------------------------------------------|
|  |  | 410.02 | Infarto miocardico acuto parete anterolaterale, assistenza successiva        | Acute myocardial infarction of anterolateral wall, episode of subsequent care          |
|  |  | 410.1  | Infarto miocardico acuto altra parte parete anteriore                        | Acute myocardial infarction of other part of anterior wall                             |
|  |  | 410.1  | Infarto miocardico parete anteriore e porzione setto interventricolare       | Acute myocardial infarction of anterior wall and part of interventricular septum       |
|  |  | 410.1  | Infarto miocardico anteroapicale e porzione setto interventricolare          | Anteroapical myocardial infarction and part of interventricular septum                 |
|  |  | 410.1  | Infarto miocardico anteroseptale e porzione setto interventricolare          | Anteroseptal myocardial infarction and part of interventricular septum                 |
|  |  | 410.10 | Infarto miocardico acuto altra parte parete anteriore                        | Acute myocardial infarction of other part of anterior wall                             |
|  |  | 410.11 | Infarto miocardico acuto altra parte parete anteriore, assistenza iniziale   | Acute myocardial infarction of other part of anterior wall, episode of initial care    |
|  |  | 410.12 | Infarto miocardico acuto altra parte parete anteriore, assistenza successiva | Acute myocardial infarction of other part of anterior wall, episode of subsequent care |
|  |  | 410.2  | Infarto miocardico acuto parete inferolaterale                               | Acute myocardial infarction of inferolateral wall                                      |
|  |  | 410.20 | Infarto miocardico acuto parete inferolaterale                               | Acute myocardial infarction of inferolateral wall                                      |
|  |  | 410.21 | Infarto miocardico acuto parete inferolaterale, assistenza iniziale          | Acute myocardial infarction of inferolateral wall, episode of initial care             |
|  |  | 410.22 | Infarto miocardico acuto parete inferolaterale, assistenza successiva        | Acute myocardial infarction of inferolateral wall, subsequent of initial care          |
|  |  | 410.3  | Infarto miocardico acuto parete inferoposteriore                             | Acute myocardial infarction of inferoposterior wall                                    |
|  |  | 410.30 | Infarto miocardico acuto parete inferoposteriore                             | Acute myocardial infarction of inferoposterior wall                                    |
|  |  | 410.31 | Infarto miocardico acuto parete inferoposteriore, assistenza iniziale        | Acute myocardial infarction of inferoposterior wall, episode of initial care           |
|  |  | 410.32 | Infarto miocardico acuto parete inferoposteriore, assistenza successiva      | Acute myocardial infarction of inferoposterior wall, episode of subsequent care        |
|  |  | 410.4  | Infarto miocardico acuto altra parte parete inferiore                        | Acute myocardial infarction of other part of the inferior wall                         |
|  |  | 410.4  | Infarto miocardico parete diaframmatica e porzione setto interventricolare   | Myocardial infarction of diaphragmatic wall and part of intrventricular septum         |
|  |  | 410.4  | Infarto miocardico parete inferiore e porzione setto interventricolare       | Myocardial infarction of inferior wall and part of interventricular septum             |

|  |  |        |                                                                              |                                                                                        |
|--|--|--------|------------------------------------------------------------------------------|----------------------------------------------------------------------------------------|
|  |  | 410.40 | Infarto miocardico acuto altra parte parete inferiore                        | Acute myocardial infarction of other part of inferior wall                             |
|  |  | 410.41 | Infarto miocardico acuto altra parte parete inferiore, assistenza iniziale   | Acute myocardial infarction of other part of inferior wall, initial episode of care    |
|  |  | 410.42 | Infarto miocardico acuto altra parte parete inferiore, assistenza successiva | Acute myocardial infarction of other part of inferior wall, subsequent episode of care |
|  |  | 410.5  | Infarto miocardico laterale alto                                             | Myocardial infarction of high lateral wall                                             |
|  |  | 410.5  | Infarto miocardico latero-apicale                                            | Myocardial infarction of lateral-apical wall                                           |
|  |  | 410.5  | Infarto miocardico acuto altra parte parete laterale                         | Acute myocardial infarction of other part of lateral wall                              |
|  |  | 410.5  | Infarto miocardico latero-basale                                             | Myocardial infarction of basal-lateral wall                                            |
|  |  | 410.5  | Infarto miocardico posterolaterale                                           | Myocardial infarction of postero-lateral wall                                          |
|  |  | 410.50 | Infarto miocardico acuto altra parte parete laterale                         | Acute myocardial infarction of other part of lateral wall                              |
|  |  | 410.51 | Infarto miocardico acuto altra parte parete laterale, assistenza iniziale    | Acute myocardial infarction of other part of lateral wall, initial episode of care     |
|  |  | 410.52 | Infarto miocardico acuto altra parte parete laterale, assistenza successiva  | Acute myocardial infarction of other part of lateral wall, subsequent episode of care  |
|  |  | 410.6  | Infarto vero parete posteriore                                               | True posterior wall infarction                                                         |
|  |  | 410.6  | Infarto miocardico posterobasale                                             | Myocardial infarction of posterobasal wall                                             |
|  |  | 410.6  | Infarto miocardico esattamente posteriore                                    | Myocardial infarction of posterior wall only                                           |
|  |  | 410.60 | Infarto strettamente posteriore                                              | True posterior wall infarction                                                         |
|  |  | 410.61 | Infarto strettamente posteriore, assistenza iniziale                         | True posterior wall infarction, initial episode of care                                |
|  |  | 410.62 | Infarto strettamente posteriore, assistenza successiva                       | True posterior wall infarction, subsequent episode of care                             |
|  |  | 410.7  | Infarto subendocardico                                                       | Subendocardial infarction                                                              |
|  |  | 410.7  | Infarto non transmurale                                                      | Nontransmural infarction                                                               |
|  |  | 410.7  | Infarto non Q                                                                | Non-Q-wave infarction                                                                  |
|  |  | 410.70 | Infarto subendocardico                                                       | Subendocardial infarction                                                              |

|  |  |        |                                                                        |                                                                                  |
|--|--|--------|------------------------------------------------------------------------|----------------------------------------------------------------------------------|
|  |  | 410.71 | Infarto subendocardico, assistenza iniziale                            | Subendocardial infarction, initial episode of care                               |
|  |  | 410.72 | Infarto subendocardico, assistenza successiva                          | Subendocardial infarction, subsequent episode of care                            |
|  |  | 410.8  | Infarto miocardico strettamente settale                                | True septal myocardial infarction                                                |
|  |  | 410.8  | Infarto miocardico acuto altre sedi specificate                        | Acute myocardial infarction in other specified sites                             |
|  |  | 410.8  | Infarto miocardico atrio                                               | Atrial myocardial infarction                                                     |
|  |  | 410.8  | Infarto miocardico muscolo papillare                                   | Myocardial infarction of papillary muscle                                        |
|  |  | 410.80 | Infarto miocardico acuto altre sedi specificate                        | Acute myocardial infarction of other specified sites                             |
|  |  | 410.81 | Infarto miocardico acuto altre sedi specificate, assistenza iniziale   | Acute myocardial infarction of other specified sites, initial episode of care    |
|  |  | 410.82 | Infarto miocardico acuto altre sedi specificate, assistenza successiva | Acute myocardial infarction of other specified sites, subsequent episode of care |
|  |  | 410.9  | Infarto miocardico acuto                                               | Acute myocardial infarction                                                      |
|  |  | 410.9  | Occlusione coronarica                                                  | Coronary occlusion                                                               |
|  |  | 410.9  | Infarto miocardico silente                                             | Silent myocardial infarction                                                     |
|  |  | 410.90 | Infarto miocardico acuto                                               | Acute myocardial infarction                                                      |
|  |  | 410.91 | Infarto miocardico acuto, assistenza iniziale                          | Acute myocardial infarction, initial episode of care                             |
|  |  | 410.92 | Infarto miocardico acuto assistenza successiva                         | Acute myocardial infarction, subsequent episode of care                          |
|  |  | 411    | Altre forme acute e subacute di cardiopatia ischemica                  | Other acute and subacute forms of ischemic heart disease                         |
|  |  | 411.0  | Sindrome post-infartuale                                               | Postmyocardial infarction syndrome                                               |
|  |  | 411.0  | Sindrome Dressler                                                      | Dressler syndrome                                                                |
|  |  | 411.1  | Sindrome coronarica intermedia                                         | Intermediate coronary syndrome                                                   |
|  |  | 411.1  | Angina pre-infartuale                                                  | Preinfarction angina                                                             |
|  |  | 411.1  | Angina instabile                                                       | Instable angina                                                                  |
|  |  | 411.1  | Infarto incombente                                                     | Imminent infarction                                                              |

|  |  |        |                                                         |                                                                |
|--|--|--------|---------------------------------------------------------|----------------------------------------------------------------|
|  |  | 411.1  | Sindrome pre-infartuale                                 | Preinfarction syndrome                                         |
|  |  | 411.8  | Forme diverse, acute e subacute, cardiopatia ischemica  | Different forms, acute and subacute, of ischemic heart disease |
|  |  | 411.81 | Occlusione coronarica senza infarto miocardico          | Coronary occlusion without myocardial infarction               |
|  |  | 411.81 | embolia coronarie                                       | Coronary embolism                                              |
|  |  | 411.81 | occlusione coronarie                                    | Coronary occlusion                                             |
|  |  | 411.81 | trombosi coronarie                                      | Coronary thrombosis                                            |
|  |  | 411.89 | Ulteriori forme, acute e subacute cardiopatia ischemica | Other forms acute and subacute ischemic heart disease          |
|  |  | 411.89 | Insufficienza coronarica acuta                          | Acute coronary insufficiency                                   |
|  |  | 411.89 | Ischemia subendocardica                                 | Subendocardial ischemia                                        |
|  |  | 413.0  | Angina da decubito                                      | Angina decubitus                                               |
|  |  | 413.0  | Angina notturna                                         | Nocturnal angina                                               |
|  |  | 413.1  | Angina Prinzmetal                                       | Prinzmetal angina                                              |
|  |  | 413.1  | Angina pectoris variante                                | Variant angina                                                 |
|  |  | 413.9  | Sindrome anginosa                                       | Anginal syndrome                                               |
|  |  | 413.9  | Angina da sforzo                                        | Effort angina                                                  |
|  |  | 413.9  | Altre forme angina pectoris                             | Other forms of angina pectoris                                 |
|  |  | 413.9  | Angina pectoris                                         | Angina pectoris                                                |
|  |  | 413.9  | Angina cardiaca                                         | Angina pectoris                                                |
|  |  | 413.9  | Stato anginoso                                          | Anginal status                                                 |
|  |  | 413.9  | Stenocardia                                             | Stenocardia                                                    |
|  |  | 413.9  | Sincope anginosa                                        | Anginal syndrome                                               |
|  |  | 413.9  | Angina pectoris                                         | Angina pectoris                                                |
|  |  | 414.0  | Cardiopatia arteriosclerotica                           | Arteriosclerotic heart disease                                 |

|  |  |        |                                                                                                               |                                                                                                                     |
|--|--|--------|---------------------------------------------------------------------------------------------------------------|---------------------------------------------------------------------------------------------------------------------|
|  |  | 414.0  | Cardiopatia aterosclerotica                                                                                   | Atherosclerotic heart disease                                                                                       |
|  |  | 414.02 | Aterosclerosi coronarica bypass venoso autologo                                                               | Coronary atherosclerosis of autologous vein bypass graft                                                            |
|  |  | 414.03 | Aterosclerosi coronarica bypass biologico non autologo                                                        | Coronary atherosclerosis of nonautologous biological bypass graft                                                   |
|  |  | 414.04 | Aterosclerosi coronarica bypass arterioso                                                                     | Coronary atherosclerosis of artery bypass graft                                                                     |
|  |  | 414.05 | Aterosclerosi coronarica bypass                                                                               | Coronary atherosclerosis of bypass graft                                                                            |
|  |  | 414.05 | Bypass coronaria                                                                                              | Coronary atherosclerosis of bypass graft                                                                            |
|  |  | 433.01 | Occlusione e stenosi arteria basilare con infarto cerebrale                                                   | Occlusion and stenosis of basilar artery with cerebral infarction                                                   |
|  |  | 433.11 | Stenosi carotide con infarto cerebrale                                                                        | Occlusion and stenosis of carotid artery with cerebral infarction                                                   |
|  |  | 433.21 | Occlusione e stenosi arteria vertebrale con infarto cerebrale                                                 | Occlusion and stenosis of vertebral artery with cerebral infarction                                                 |
|  |  | 433.31 | Occlusioni e stenosi multiple e bilaterali a. precerebrali con infarto cer.                                   | Occlusion and stenosis of multiple and bilateral precerebral arteries with cerebral infarction                      |
|  |  | 433.81 | Occlusione e stenosi altre arterie precerebrali con infarto cerebrale                                         | Occlusion and stenosis of other specified precerebral artery with cerebral infarction                               |
|  |  | 433.91 | Occlusione e stenosi arteria precerebrale con infarto cerebrale                                               | Occlusion and stenosis of unspecified precerebral artery with cerebral infarction                                   |
|  |  | 434.01 | Trombosi cerebrale con infarto cerebrale                                                                      | Cerebral thrombosis with cerebral infarction                                                                        |
|  |  | 434.11 | Embolia cerebrale con infarto cerebrale                                                                       | Cerebral embolism with cerebral infarction                                                                          |
|  |  | 434.91 | Occlusione arteria cerebrale con infarto cerebrale                                                            | Cerebral artery occlusion with cerebral infarction                                                                  |
|  |  | 435    | Ischemia cerebrale transitoria. Spasmi arterie cerebrali. Insufficienza cerebrovascolare acuta con temporanei | Transient cerebral ischemia. Spasms of cerebral arteries. Acute cerebrovascular insufficiency with transient spasms |
|  |  | 435.0  | Sindrome arteria basilare                                                                                     | Basilar artery syndrome                                                                                             |
|  |  | 435.1  | Sindrome arteria vertebrale                                                                                   | Vertebral artery syndrome                                                                                           |
|  |  | 435.2  | Sindrome furto succlavia                                                                                      | Subclavian steal syndrome                                                                                           |
|  |  | 435.3  | Sindrome arteria vertebrobasilare                                                                             | Vertebrobasilar artery syndrome                                                                                     |
|  |  | 435.8  | Altra ischemia cerebrale transitoria specificata                                                              | Other specified transient cerebral ischemia                                                                         |

|                                 |                                        |        |                                                                       |                                                        |
|---------------------------------|----------------------------------------|--------|-----------------------------------------------------------------------|--------------------------------------------------------|
|                                 |                                        | 435.9  | Ischemia cerebrale transitoria                                        | Transient cerebral ischemia                            |
|                                 |                                        | 435.9  | Accidente cerebrovascolare incombente                                 | Imminent cerebrovascular accident                      |
|                                 |                                        | 435.9  | Attacco ischemico transitorio, TIA                                    | Transient ischemic attack, TIA                         |
|                                 |                                        | 435.9  | Ischemia cerebrale intermittente                                      | Intermittent cerebral ischemia                         |
|                                 |                                        | 435.9  | Spasmi arterie cerebrali                                              | Spasms of cerebral arteries                            |
|                                 |                                        | 436    | Vasculopatie cerebrali acute, mal definite                            | Acute, but ill-defined, cerebrovascular diseases       |
|                                 |                                        | 436    | Apoplessia, apoplettico attacco cerebrale. Accidente cerebrovascolare | Apoplexy, apoplectic stroke. Cerebrovascular accident. |
|                                 |                                        | 436    | Apoplessia, apoplettico                                               | Apoplexy, apoplectic                                   |
|                                 |                                        | 436    | Apoplessia, apoplettico attacco                                       | Apoplexy, apoplectic stroke                            |
|                                 |                                        | 436    | Apoplessia, apoplettico cerebrale                                     | Apoplexy, cerebral apoplexy                            |
|                                 |                                        | 436    | Ictus cerebrale                                                       | Cerebral ictus                                         |
|                                 |                                        | 436    | Accidente cerebrovascolare                                            | Cerebrovascular accident                               |
|                                 |                                        | 436    | Stroke                                                                | Stroke                                                 |
|                                 |                                        | 438    | Postumi delle malattie cerebrovascolari                               | Consequenes of cerebrovascular diseases                |
|                                 |                                        | 438    | Postumi malattie cerebrovascolari                                     | Cerebrovascular disease consequences                   |
|                                 |                                        | 438    | Emiplegia post malattia cerebrovascolare                              | Hemiplegia following cerebrovascular disease           |
|                                 |                                        | 438    | Emiparesi post malattia cerebrovascolare                              | Hemiparesis following cerebrovascular disease          |
|                                 |                                        | 440.20 | Ateriopatia arti inferiori                                            | Atherosclerosis of lower extremities                   |
| (DM)                            | Diabetes unspecified                   | 250*   |                                                                       |                                                        |
| (DM ASYMPTOMATIC COMPLICATIONS) | Asymptomatic complications of diabetes | 411.81 | Occlusione coronarica senza infarto miocardico                        | Acute coronary occlusion without myocardial infarction |
|                                 |                                        | 411.81 | embolia coronarie                                                     | Embolism of coronary arteries                          |
|                                 |                                        | 411.81 | trombosi coronarie                                                    | Thrombosis of coronary arteries                        |

|  |  |        |                                                                                                               |                                                                                                                      |
|--|--|--------|---------------------------------------------------------------------------------------------------------------|----------------------------------------------------------------------------------------------------------------------|
|  |  | 411.81 | occlusione coronarie                                                                                          | Occlusion without myocardial infarction of coronary arteries                                                         |
|  |  | 414.0  | stenosi coronarie                                                                                             | Stenosis of coronary arteries                                                                                        |
|  |  | 414.0  | Aterosclerosi coronarica                                                                                      | Coronary atherosclerosis                                                                                             |
|  |  | 414.0  | arteriosclerosi coronarie                                                                                     | Arteriosclerosis of coronary arteries                                                                                |
|  |  | 414.0  | sclerosi coronarie                                                                                            | Sclerosis of coronary arteries                                                                                       |
|  |  | 414.0  | ateroma coronarie                                                                                             | Atheroma of coronary arteries                                                                                        |
|  |  | 414.0  | arterite o endoarterite coronarie                                                                             | Arteritis or endarteritis of coronary arteries                                                                       |
|  |  | 414.00 | Aterosclerosi coronarica                                                                                      | Coronary atherosclerosis                                                                                             |
|  |  | 414.01 | Aterosclerosi coronarica arteria coronarica nativa                                                            | Coronary atherosclerosis of native coronary artery                                                                   |
|  |  | 433    | Occlusione e stenosi arterie precerebrali. Embolo, restringimento, ostruzione, trombosi arterie precerebrali. | Occlusion and stenosis of precerebral arteries. Precerebral arteries embolism, constriction, obstruction, thrombosis |
|  |  | 433.0  | Occlusione e stenosi arteria basilare                                                                         | Occlusion and stenosis of basilar artery                                                                             |
|  |  | 433.00 | Occlusione e stenosi arteria basilare senza infarto cerebrale                                                 | Occlusion and stenosis of basilar artery without cerebral infarction                                                 |
|  |  | 433.1  | Stenosi carotide                                                                                              | Carotid stenosis                                                                                                     |
|  |  | 433.10 | Stenosi carotide bilaterale                                                                                   | Bilateral carotid stenosis                                                                                           |
|  |  | 433.10 | Stenosi carotide sx                                                                                           | Stenosis of left carotid artery                                                                                      |
|  |  | 433.10 | Occlusione e stenosi carotide senza infarto cerebrale                                                         | Occlusion and stenosis of carotid artery without cerebral infarction                                                 |
|  |  | 433.10 | Stenosi carotide dx                                                                                           | Stenosis of right carotid artery                                                                                     |
|  |  | 433.2  | Occlusione e stenosi arteria vertebrale                                                                       | Occlusion and stenosis of vertebral artery                                                                           |
|  |  | 433.20 | Occlusione e stenosi arteria vertebrale senza infarto cerebrale                                               | Occlusion and stenosis of vertebral artery without cerebral infarction                                               |
|  |  | 433.3  | Occlusioni e stenosi multiple e bilaterali arterie precerebrali                                               | Bilateral and multi-site occlusions and stenoses of precerebral arteries                                             |
|  |  | 433.30 | Occlusioni e stenosi multiple arterie precerebrali senza infarto cerebrale                                    | Occlusion and stenosis of multiple and bilateral precerebral arteries without mention of cerebral infarction         |
|  |  | 433.8  | Occlusione e stenosi altre arterie precerebrali specificate                                                   | Occlusion and stenosis of other specified precerebral arteries                                                       |

|                            |                                   |        |                                                                         |                                                                                  |
|----------------------------|-----------------------------------|--------|-------------------------------------------------------------------------|----------------------------------------------------------------------------------|
|                            |                                   | 433.80 | Occlusione e stenosi altre arterie precerebrali senza infarto cerebrale | Occlusion and stenosis of other precerebral arteries without cerebral infarction |
|                            |                                   | 433.9  | Occlusione e stenosi arteria precerebrale                               | Precerebral artery occlusion and stenosis                                        |
|                            |                                   | 433.9  | Ostruzione arterie precerebrali                                         | Obstruction of precerebral arteries                                              |
|                            |                                   | 433.9  | Stenosi arterie precerebrali                                            | Stenosis of precerebral arteries                                                 |
|                            |                                   | 433.90 | Occlusione e stenosi arteria precerebrale senza infarto cerebrale       | Occlusion and stenosis of precerebral artery without cerebral infarction         |
|                            |                                   | 434    | Occlusione delle arterie cerebrali                                      | Occlusion of cerebral arteries                                                   |
|                            |                                   | 434.0  | Trombosi cerebrale                                                      | Cerebral thrombosis                                                              |
|                            |                                   | 434.0  | Trombosi arterie cerebrali                                              | Thrombosis of cerebral arteries                                                  |
|                            |                                   | 434.00 | Trombosi cerebrale senza infarto cerebrale                              | Cerebral thrombosis without cerebral infarction                                  |
|                            |                                   | 434.1  | Embolia cerebrale                                                       | Cerebral embolism                                                                |
|                            |                                   | 434.10 | Embolia cerebrale senza infarto cerebrale                               | Cerebral embolism without cerebral infarction                                    |
|                            |                                   | 434.9  | Occlusione arteria cerebrale                                            | Cerebral artery occlusion                                                        |
|                            |                                   | 434.90 | Occlusione arteria cerebrale senza infarto cerebrale                    | Cerebral artery occlusion without cerebral infarction                            |
|                            |                                   | 440.20 | Aterosclerosi arti inferiori                                            | Atherosclerosis of the lower extremities                                         |
|                            |                                   | 440.29 | Altre aterosclerosi arti                                                | Other atheroscleroses of the extremities                                         |
|                            |                                   | 447.1  | Stenosi arterie                                                         | Stenosis of arteries                                                             |
|                            |                                   | 447.1  | Stenosi arteria renale                                                  | Renal artery stenosi                                                             |
| (DM CHRONIC COMPLICATIONS) | Chronic complications of diabetes | 250.4  | Diabete con complicanze renali                                          | Diabetes with renal complications                                                |
|                            |                                   | 250.42 | Diabete tipo II, scompensato, con complicanze renali                    | Diabetes type II, uncontrolled, with renal complications                         |
|                            |                                   | 250.5  | Diabete con complicanze oculari                                         | Diabetes with ophthalmic complications                                           |
|                            |                                   | 250.52 | Diabete tipo II, scompensato, con complicanze oculari                   | Diabetes type II, uncontrolled, with ophthalmic complications                    |
|                            |                                   | 250.6  | Diabete con complicanze neurologiche                                    | Diabetes with neurological complications                                         |



|  |  |        |                                                                                 |                                                                           |
|--|--|--------|---------------------------------------------------------------------------------|---------------------------------------------------------------------------|
|  |  | 250.62 | Diabete tipo II, scompensato, con complicanze neurologiche                      | Diabetes type II, uncontrolled, with neurological complications           |
|  |  | 250.7  | Diabete con complicanze circolatorie periferiche                                | Diabetes with peripheral circulatory complications                        |
|  |  | 250.72 | Diabete tipo II, scompensato, con complicanze circolatorie periferiche          | Diabetes type II, uncontrolled, with circulatory peripheral complications |
|  |  | 250.8  | Shock ipoglicemico; Piede diabetico                                             | Hypoglycemic shock; Diabetic foot                                         |
|  |  | 250.82 | Diabete tipo II, scompensato, con altre complicanze specificate                 | Diabetes type II, uncontrolled, with other specified complications        |
|  |  | 250.9  | Diabete con complicanze                                                         | Diabetes with complications                                               |
|  |  | 250.90 | Diabete tipo II con complicanze                                                 | Diabetes type II with complications                                       |
|  |  | 250.92 | Diabete tipo II scompensato, con complicanze                                    | Diabetes type II, uncontrolled, with complications                        |
|  |  | 337.1  | Neuropatia periferica sistema nervoso autonomo in disturbi classificati altrove | Peripheral autonomic neuropathy in disorders classified elsewhere         |
|  |  | 357.2  | Polineuropatia diabetica                                                        | Polyneuropathy in diabetes                                                |
|  |  | 361    | Distacco e rotture della retina                                                 | Retinal detachment and tears                                              |
|  |  | 361.0  | Distacco retina con rottura retinica                                            | Retinal detachment with retinal tear                                      |
|  |  | 361.0  | Distacco retina regmatogeno                                                     | Rhegmatogenous retinal detachment                                         |
|  |  | 361.00 | Distacco retina con rottura retinica                                            | Retinal detachment with retinal tear                                      |
|  |  | 361.01 | Recente distacco retina, parziale, con rottura singola                          | Recent retinal detachment, partial, with single tear                      |
|  |  | 361.02 | Recente distacco retina, parziale, con rotture multiple                         | Recent retinal detachment, partial, with multiple tears                   |
|  |  | 361.03 | Distacco recente parziale retina, con rottura gigante                           | Recent partial retinal detachment, with giant tear                        |
|  |  | 361.04 | Distacco recente parziale retina, con dialisi retinica                          | Recent partial retinal detachment, with retinal dialysis                  |
|  |  | 361.04 | Dialisi giovanile retinica con distacco                                         | Juvenile retinal dialysis with detachment                                 |
|  |  | 361.05 | Distacco recente retina, totale o subtotale                                     | Recent retinal detachment, total or subtotal                              |
|  |  | 361.06 | Vecchio distacco retina, parziale                                               | Old retinal detachment, partial                                           |
|  |  | 361.07 | Distacco inveterato retina, totale o subtotale                                  | Inveterate retinal detachment, total or subtotal                          |

|  |  |        |                                                                      |                                                                        |
|--|--|--------|----------------------------------------------------------------------|------------------------------------------------------------------------|
|  |  | 362.0  | Retinopatia diabetica                                                | Diabetic retinopathy                                                   |
|  |  | 362.01 | Retinopatia diabetica semplice                                       | Simple diabetic retinopathy                                            |
|  |  | 362.01 | Microaneurisma retinico diabetico                                    | Microaneurysm in diabetes retinopathy                                  |
|  |  | 362.01 | Retinopatia diabetica                                                | Diabetic retinopathy                                                   |
|  |  | 362.02 | Retinopatia diabetica proliferativa                                  | Proliferative diabetic retinopathy                                     |
|  |  | 365.44 | Glaucoma associato a sindromi sistemiche                             | Glaucoma associated with systemic syndromes                            |
|  |  | 366.41 | Cataratta diabetica                                                  | Diabetic cataract                                                      |
|  |  | 369.9  | Cecità diabetica                                                     | Visual loss in diabetic                                                |
|  |  | 581.1  | Sindrome nefrosica, con lesioni glomerulonefrite membranosa          | Nephrotic syndrome with lesion of membranous glomerulonephritis        |
|  |  | 581.8  | Sindrome nefrosica, con altre lesioni istologiche renali specificate | Nephrotic syndrome with other specified histological renal lesions     |
|  |  | 581.81 | Sindrome nefrosica, in altre malattie                                | Nephrotic syndrome in other diseases                                   |
|  |  | 581.89 | Sindrome nefrosica, con altre lesioni istologiche renali specificate | Nephrotic syndrome with other specified histological renal lesions     |
|  |  | 581.89 | Glomerulonefrite con edema e lesioni tipo nefrite essudativa         | Glomerulonephritis with oedema and exudative nephritis-like lesions    |
|  |  | 581.89 | Glomerulonefrite con edema e lesioni tipo nefrite interstiziale      | Glomerulonephritis with oedema and interstitial nephritis-like lesions |
|  |  | 583.81 | Nefrite e nefropatia, in altre malattie                              | Nephritis and nephropathy, in other diseases                           |
|  |  | 585    | Insufficienza renale cronica                                         | Chronic renal failure                                                  |
|  |  | 585    | Uremia cronica                                                       | Chronic uremia                                                         |
|  |  | 707.1  | Ulcera degli arti inferiori, eccetto ulcera da decubito              | Lower limbs ulcer, excluding decubitus ulcer                           |
|  |  | 707.1  | Ulcera cronica neurogena degli arti inferiori                        | Neurogenic chronic ulcer of lower limbs                                |
|  |  | 707.1  | Ulcera cronica trofica                                               | Chronic trophic ulcer                                                  |
|  |  | 707.1  | Ulcera diabetica arti inferiori                                      | Diabetic ulcer of lower limbs                                          |
|  |  | 785.4  | Gangrena                                                             | Gangrene                                                               |
|  |  | 785.4  | Gangrena propagazione cutanea                                        | Cutaneous propagation of gangrene                                      |

|                    |                        |        |                                                                              |                                                                       |
|--------------------|------------------------|--------|------------------------------------------------------------------------------|-----------------------------------------------------------------------|
|                    |                        | 785.4  | Fagedenismo                                                                  | Fagedenism                                                            |
|                    |                        | 785.4  | Amputazione diabetica                                                        | Diabetic amputation                                                   |
|                    |                        | 791.0  | Albuminuria                                                                  | Albuminuria                                                           |
|                    |                        | 791.0  | Proteinuria                                                                  | Proteinuria                                                           |
|                    |                        | V45.1  | Dialisi                                                                      | Dialysis                                                              |
|                    |                        | V49.7  | Amputazione arto inferiore                                                   | Lower limb amputation status                                          |
|                    |                        | V49.70 | amputazione arto inferiore                                                   | Lower limb amputation status                                          |
|                    |                        | V49.71 | Amputazione alluce                                                           | Great toe amputation status                                           |
|                    |                        | V49.72 | Amputazione altro(e) dito(a) piede                                           | Other toe(s) foot amputation status                                   |
|                    |                        | V49.73 | Amputazione piede                                                            | Foot amputation status                                                |
|                    |                        | V49.74 | Amputazione caviglia                                                         | Ankle amputation status                                               |
|                    |                        | V49.75 | Amputazione sotto ginocchio                                                  | Below knee amputation status                                          |
|                    |                        | V49.76 | Amputazione sopra ginocchio                                                  | Above knee amputation status                                          |
|                    |                        | V49.77 | Amputazione anca                                                             | Hip amputation status                                                 |
|                    |                        | V56    | Trattamento ulteriore che richiede dialisi intermittente                     | Additional treatment that requiring intermittent dialysis             |
|                    |                        | V56.0  | Trattamento ulteriore che richiede dialisi extracorporea                     | Additional treatment that requiring extracorporeal dialysis           |
|                    |                        | V56.0  | Dialisi renale                                                               | Renal dialysis                                                        |
|                    |                        | V56.1  | Collocazione e sistemazione catetere, extracorporeo, peritoneale per dialisi | Fitting and adjustment of extracorporeal peritoneal dialysis catheter |
|                    |                        | V56.1  | Estrazione o sostituzione catetere per dialisi                               | Removal and replacement of dialysis catheter                          |
|                    |                        | V56.1  | Toiletta o pulitura catetere per dialisi                                     | Cleaning of dialysis catheter                                         |
|                    |                        | V56.8  | Trattamento ulteriore che richiede altra dialisi                             | Additional treatment requiring other dalisis                          |
|                    |                        | V56.8  | Dialisi peritoneale                                                          | Peritoneal dialysis                                                   |
| (DM UNCOMPLICATED) | Diabetes uncomplicated | 250.0  | Diabete mellito senza complicanze                                            | Diabetes mellitus without complications                               |

|        |                                                          |                                                                   |                                                                       |                                                                          |
|--------|----------------------------------------------------------|-------------------------------------------------------------------|-----------------------------------------------------------------------|--------------------------------------------------------------------------|
|        |                                                          | 250.0                                                             | Diabete mellito                                                       | Diabetes mellitus                                                        |
|        |                                                          | 250.0                                                             | Diabete                                                               | Diabetes                                                                 |
|        |                                                          | 250.0                                                             | Diabete ben compensato con sola dieta                                 | Diabetes well controlled with diet only                                  |
|        |                                                          | 250.0                                                             | Diabete ben compensato con terapia farmacologica                      | Diabetes well controlled with diet pharmacological therapy               |
|        |                                                          | 250.00                                                            | Diabete mellito tipo II                                               | Diabetes mellitus type II                                                |
| (DM1)  | Diabetes type 1                                          | 250.01                                                            | Diabete mellito tipo I                                                | Diabetes mellitus type I                                                 |
|        |                                                          | 250.03                                                            | Diabete mellito tipo I, scompensato                                   | Diabetes mellitus type I, uncontrolled                                   |
|        |                                                          | 250.11                                                            | Diabete con chetoacidosi, tipo I                                      | Diabetes with ketoacidosis, type I                                       |
|        |                                                          | 250.13                                                            | Diabete con chetoacidosi, tipo I, scompensato                         | Diabetes with ketoacidosis, type I, uncontrolled                         |
|        |                                                          | 250.21                                                            | Diabete con iperosmolarità, tipo I                                    | Diabetes with hyperosmolarity, type I                                    |
|        |                                                          | 250.23                                                            | Diabete con iperosmolarità, tipo I, scompensato                       | Diabetes with hyperosmolarity, type I, uncontrolled                      |
|        |                                                          | 250.31                                                            | Diabete con altri tipi coma, tipo I                                   | Diabetes with other types of coma, type I                                |
|        |                                                          | 250.33                                                            | Diabete con altri tipi coma, tipo I, scompensato                      | Diabetes with other types of coma, type I, uncontrolled                  |
|        |                                                          | 250.41                                                            | Diabete tipo I, con complicanze renali                                | Diabetes type I, with renal complications                                |
|        |                                                          | 250.43                                                            | Diabete tipo I, scompensato, con complicanze renali                   | Diabetes type I, uncontrolled, with renal complications                  |
|        |                                                          | 250.51                                                            | Diabete tipo I, non definito se controllato, con complicanze oculari  | Diabetes type I, not stated if controlled, with ophthalmic complications |
|        |                                                          | 250.53                                                            | Diabete tipo I, scompensato, con complicanze oculari                  | Diabetes type I, uncontrolled, with ophthalmic complications             |
|        |                                                          | 250.61                                                            | Diabete tipo I, con complicanze neurologiche                          | Diabetes type I, with neurological complications                         |
|        |                                                          | 250.63                                                            | Diabete tipo I, scompensato, con complicanze neurologiche             | Diabetes type I, uncontrolled, with neurological complications           |
|        |                                                          | 250.71                                                            | Diabete tipo I, con complicanze circolatorie periferiche              | Diabetes type I, with peripheral circulatory complications               |
|        |                                                          | 250.73                                                            | Diabete tipo I, scompensato, con complicanze circolatorie periferiche | Diabetes type I, uncontrolled, with peripheral circulatory complications |
|        |                                                          | 250.81                                                            | Diabete tipo I, con altre complicanze specificate                     | Diabetes type I, with other specified complications                      |
| 250.83 | Diabete tipo I, scompensato, con complicanze specificate | Diabetes type I, uncontrolled, with other specified complications |                                                                       |                                                                          |

|      |               |        |                                                                               |                                                                                         |
|------|---------------|--------|-------------------------------------------------------------------------------|-----------------------------------------------------------------------------------------|
|      |               | 250.91 | Diabete tipo I, con complicanze                                               | Diabetes type I, with complications                                                     |
|      |               | 250.93 | Diabete tipo I, scompensato, con complicanze                                  | Diabetes type I, uncontrolled, with complications                                       |
| (HF) | Heart failure | 398.91 | Insufficienza ventricolo sn su base reumatica                                 | Left ventricular failure in rheumatic heart disease                                     |
|      |               | 398.91 | Insufficienza reumatica cuore congestizia                                     | Rheumatic heart failure (congestive)                                                    |
|      |               | 402.01 | Cardiopia ipertensiva maligna con insufficienza cardiaca congestizia          | Malignant hypertensive heart disease with congestive heart failure                      |
|      |               | 402.11 | Cardiopia ipertensiva benigna con insufficienza cardiaca congestizia          | Benign hypertensive heart disease with congestive heart failure                         |
|      |               | 402.91 | Cardiopia ipertensiva con insufficienza cardiaca congestizia                  | Hypertensive heart disease with congestive heart failure                                |
|      |               | 404.01 | Cardionefropatia ipertensiva maligna con insufficienza cardiaca congestizia   | Malignant hypertensive heart and kidney disease with congestive heart failure           |
|      |               | 404.03 | Cardionefropatia ipertensiva maligna con insuf. cardiaca congestizia e renale | Malignant hypertensive heart and kidney disease with congestive heart and renal failure |
|      |               | 404.11 | Cardionefropatia ipertensiva benigna con insufficienza cardiaca congestizia   | Benign hypertensive heart and kidney disease with congestive heart failure              |
|      |               | 404.13 | Cardionefropatia ipertensiva benigna con insuf. cardiaca congestizia e renale | Benign hypertensive heart and kidney disease with congestive heart and renal failure    |
|      |               | 404.91 | Cardionefropatia ipertensiva con insufficienza cardiaca congestizia           | Hypertensive heart and kidney disease with congestive heart failure                     |
|      |               | 404.93 | Cardionefropatia ipertensiva con insuf. cardiaca congestizia e renale         | Hypertensive heart and kidney disease with congestive heart and renal failure           |
|      |               | 428    | Insufficienza cardiaca (scompenso cardiaco)                                   | Heart failure                                                                           |
|      |               | 428.0  | Insufficienza cardiaca destra, secondaria a insufficienza cardiaca sinistra   | Right-sided heart failure, secondary to left-sided heart failure                        |
|      |               | 428.0  | Malattia cardiaca congestizia                                                 | Congestive heart failure, unspecified                                                   |
|      |               | 428.0  | Insufficienza cardiaca congestizia, scompenso cardiaco congestizio            | Congestive heart disease                                                                |
|      |               | 428.1  | Insufficienza ventricolare sinistra                                           | Left ventricular failure                                                                |
|      |               | 428.1  | Asma cardiaco                                                                 | Cardiac asthma                                                                          |

|                                 |                                                           |                                                             |                                                                                                                          |                                                                                                                                     |
|---------------------------------|-----------------------------------------------------------|-------------------------------------------------------------|--------------------------------------------------------------------------------------------------------------------------|-------------------------------------------------------------------------------------------------------------------------------------|
|                                 |                                                           | 428.1                                                       | Insufficienza cuore sn, scompenso cardiaco sinistro                                                                      | Left-sided heart failure                                                                                                            |
|                                 |                                                           | 428.1                                                       | Edema polmonare acuto con malattia cardiaca o insufficienza cardiaca                                                     | Acute pulmonary Oedema with heart disease or failure                                                                                |
|                                 |                                                           | 428.1                                                       | Edema acuto polmone con malattia cardiaca o insufficienza cardiaca                                                       | Acute pulmonary Oedema with heart disease or failure                                                                                |
|                                 |                                                           | 428.9                                                       | Insufficienza cardiaca 3° classe NYHA                                                                                    | Heart failure, NYHA class III                                                                                                       |
|                                 |                                                           | 428.9                                                       | Insufficienza cardiaca 4° classe NYHA                                                                                    | Heart failure, NYHA class IV                                                                                                        |
|                                 |                                                           | 428.9                                                       | Insufficienza cardiaca                                                                                                   | Heart failure                                                                                                                       |
|                                 |                                                           | 428.9                                                       | Insufficienza miocardica                                                                                                 | Myocardial failure                                                                                                                  |
|                                 |                                                           | 428.9                                                       | Insufficienza cardiaca 2° classe NYHA                                                                                    | Heart failure, NYHA class II                                                                                                        |
|                                 |                                                           | 428.9                                                       | Insufficienza cuore                                                                                                      | Cardiac failure                                                                                                                     |
|                                 |                                                           | 428.9                                                       | Scompenso cardiaco                                                                                                       | Heart failure                                                                                                                       |
| (HYPERTENSION<br>COMPLICATIONS) | Complications of<br>hypertension                          | 402                                                         | Cardiopia ipertensiva. Cardiomegalia ipertensiva. Malattia cardiovascolare ipertensiva                                   | Hypertensive heart disease. Hypertensive cardiomegaly. Hypertensive cardiovascular disease.                                         |
|                                 |                                                           | 402.0                                                       | Cardiopia ipertensiva maligna                                                                                            | Malignant hypertensive heart disease                                                                                                |
|                                 |                                                           | 402.00                                                      | Cardiopia ipertensiva maligna senza insufficienza cardiaca congestizia                                                   | Malignant hypertensive heart disease without congestive heart failure                                                               |
|                                 |                                                           | 402.1                                                       | Cardiopia ipertensiva benigna                                                                                            | Benign hypertensive hearth disease                                                                                                  |
|                                 |                                                           | 402.10                                                      | Cardiopia ipertensiva benigna senza insufficienza cardiaca congestizia                                                   | Benign hypertensive heart disease without congestive heart failure                                                                  |
|                                 |                                                           | 402.9                                                       | Cardiopia ipertensiva                                                                                                    | Hypertensive hearth disease                                                                                                         |
|                                 |                                                           | 402.9                                                       | Malattia cardiovascolare ipertensiva                                                                                     | Hypertensive cardiovascular disease.                                                                                                |
|                                 |                                                           | 402.90                                                      | Cardiopia ipertensiva senza insufficienza cardiaca congestizia                                                           | Hypertensive hearth disease without congestive heart failure                                                                        |
|                                 |                                                           | 403                                                         | Nefropatia, insufficienza renale, uremia cronica ipertensiva. Nefrite arteriolare, arteriosc., nefrovascolare da iperten | Kidney disease, renal failure, chronic hypertensive uremia, arteriolar nephritis, renovascular arteriosclerosis due to hypertension |
|                                 |                                                           | 403.0                                                       | Nefropatia ipertensiva maligna                                                                                           | Malignant hypertensive kidney disease                                                                                               |
| 403.00                          | Nefropatia ipertensiva maligna senza insufficienza renale | Malignant hypertensive kidney disease without renal failure |                                                                                                                          |                                                                                                                                     |

|  |  |        |                                                                                                              |                                                                                                                     |
|--|--|--------|--------------------------------------------------------------------------------------------------------------|---------------------------------------------------------------------------------------------------------------------|
|  |  | 403.01 | Nefropatia ipertensiva maligna con insufficienza renale                                                      | Malignant hypertensive kidney disease with renal failure                                                            |
|  |  | 403.1  | Nefropatie ipertensiva benigna                                                                               | Benign hypertensive kidney disease                                                                                  |
|  |  | 403.10 | Nefropatia ipertensiva benigna senza insufficienza renale                                                    | Benign hypertensive kidney disease without renal failure                                                            |
|  |  | 403.11 | Nefropatia ipertensiva benigna con insufficienza renale                                                      | Benign hypertensive kidney disease with renal failure                                                               |
|  |  | 403.9  | Nefropatia ipertensiva                                                                                       | Hypertensive kidney disease                                                                                         |
|  |  | 403.90 | Nefropatia ipertensiva senza insufficienza renale                                                            | Hypertensive kidney disease without renal failure                                                                   |
|  |  | 403.91 | Nefropatia ipertensiva con insufficienza renale                                                              | Hypertensive kidney disease with renal failure                                                                      |
|  |  | 404    | Cardionefropatia ipertensiva. Malattia cardiorenale ipertensiva. Malattia cardiovascolare renale ipertensiva | Hypertensive heart and kidney disease Hypertensive cardiorenal disease. Hypertensive cardiovascular kidney disease. |
|  |  | 404.0  | Cardionefropatia ipertensiva maligna                                                                         | Malignant hypertensive heart and kidney disease                                                                     |
|  |  | 404.00 | Cardionefropatia ipertensiva maligna                                                                         | Malignant hypertensive heart and kidney disease                                                                     |
|  |  | 404.02 | Cardionefropatia ipertensiva maligna con insufficienza renale                                                | Malignant hypertensive heart and kidney disease with renal failure                                                  |
|  |  | 404.1  | Cardionefropatia ipertensiva benigna                                                                         | Benign hypertensive heart and kidney disease                                                                        |
|  |  | 404.10 | Cardionefropatia ipertensiva benigna                                                                         | Benign hypertensive heart and kidney disease                                                                        |
|  |  | 404.12 | Cardionefropatia ipertensiva benigna con insufficienza renale                                                | Benign hypertensive heart and kidney disease with renal failure                                                     |
|  |  | 404.9  | Cardionefropatia ipertensiva                                                                                 | Hypertensive heart and kidney disease                                                                               |
|  |  | 404.9  | Malattia cardiorenale ipertensiva                                                                            | Ipertensive cardiorenal syndrome                                                                                    |
|  |  | 404.90 | Cardionefropatia ipertensiva                                                                                 | Hypertensive heart and kidney disease                                                                               |
|  |  | 404.92 | Cardionefropatia ipertensiva con insufficienza renale                                                        | Hypertensive heart and kidney disease with renal failure                                                            |
|  |  | 405    | Ipertensione secondaria                                                                                      | Secondary hypertension                                                                                              |
|  |  | 405.0  | Ipertensione secondaria maligna                                                                              | Malignant secondary hypertension                                                                                    |
|  |  | 405.01 | Ipertensione renovascolare maligna                                                                           | Malignant renovascular hypertension                                                                                 |
|  |  | 405.09 | Ipertensione secondaria maligna altra origine                                                                | Other malignant secondary hypertension                                                                              |
|  |  | 405.1  | Ipertensione secondaria benigna                                                                              | Benign secondary hypertension                                                                                       |

|                |              |        |                                                                        |                                                                       |
|----------------|--------------|--------|------------------------------------------------------------------------|-----------------------------------------------------------------------|
|                |              | 405.11 | Ipertensione renovascolare benigna                                     | Benign renovascular hypertension                                      |
|                |              | 405.19 | Ipertensione secondaria benigna altra origine                          | Other benign secondary hypertension                                   |
|                |              | 405.9  | Ipertensione secondaria                                                | Secondary hypertension                                                |
|                |              | 405.91 | Ipertensione renovascolare                                             | Renovascular hypertension                                             |
|                |              | 405.99 | Ipertensione secondaria altra origine                                  | Other renovascular hypertension                                       |
|                |              | 4402.9 | Ipertrofia Ventricolare Sinistra                                       | Left ventricular hypertrophy                                          |
| (HYPERTENSION) | Hypertension | 4010   | Ipertensione essenziale maligna                                        | Malignant essential hypertension                                      |
|                |              | 4011   | Ipertensione essenziale benigna                                        | Benign essential hypertension                                         |
|                |              | 4019   | Ipertensione essenziale                                                | Essential hypertension                                                |
|                |              | 40200  | Cardiopia ipertensiva maligna senza insufficienza cardiaca congestizia | Malignant hypertensive heart disease without congestive heart failure |
|                |              | 40201  | Cardiopia ipertensiva maligna con insufficienza cardiaca congestizia   | Malignant hypertensive heart disease with congestive heart failure    |
|                |              | 40210  | Cardiopia ipertensiva benigna senza insufficienza cardiaca congestizia | Benign hypertensive heart disease without congestive heart failure    |
|                |              | 40211  | Cardiopia ipertensiva benigna con insufficienza cardiaca congestizia   | Benign hypertensive heart disease with congestive heart failure       |
|                |              | 40290  | Cardiopia ipertensiva senza insufficienza cardiaca congestizia         | Hypertensive hearth disease without congestive heart failure          |
|                |              | 40291  | Cardiopia ipertensiva con insufficienza cardiaca congestizia           | Hypertensive hearth disease with congestive heart failure             |
|                |              | 40300  | Nefropatia ipertensiva maligna senza insufficienza renale              | Malignant hypertensive kidney disease without renal failure           |
|                |              | 40301  | Nefropatia ipertensiva maligna con insufficienza renale                | Malignant hypertensive kidney disease with renal failure              |
|                |              | 40310  | Nefropatia ipertensiva benigna senza insufficienza renale              | Benign hypertensive kidney disease without renal failure              |
|                |              | 40311  | Nefropatia ipertensiva benigna con insufficienza renale                | Benign hypertensive kidney disease with renal failure                 |
|                |              | 40390  | Nefropatia ipertensiva senza insufficienza renale                      | Hypertensive kidney disease without renal failure                     |
|                |              | 40391  | Nefropatia ipertensiva con insufficienza renale                        | Hypertensive kidney disease with renal failure                        |



|                               |                             |       |                                                                               |                                                                                         |
|-------------------------------|-----------------------------|-------|-------------------------------------------------------------------------------|-----------------------------------------------------------------------------------------|
|                               |                             | 40400 | Cardionefropatia ipertensiva maligna                                          | Malignant hypertensive heart and kidney disease                                         |
|                               |                             | 40401 | Cardionefropatia ipertensiva maligna con insufficienza cardiaca congestizia   | Malignant hypertensive heart and kidney disease with congestive heart failure           |
|                               |                             | 40402 | Cardionefropatia ipertensiva maligna con insufficienza renale                 | Malignant hypertensive heart and kidney disease with renal failure                      |
|                               |                             | 40403 | Cardionefropatia ipertensiva maligna con insuf. cardiaca congestizia e renale | Malignant hypertensive heart and kidney disease with congestive heart nad renal failure |
|                               |                             | 40410 | Cardionefropatia ipertensiva benigna                                          | Benign hypertensive heart and kidney disease                                            |
|                               |                             | 40411 | Cardionefropatia ipertensiva benigna con insufficienza cardiaca congestizia   | Benign hypertensive heart and kidney disease with congestive heart failure              |
|                               |                             | 40412 | Cardionefropatia ipertensiva benigna con insufficienza renale                 | Benign hypertensive heart and kidney disease with renal failure                         |
|                               |                             | 40413 | Cardionefropatia ipertensiva benigna con insuf. cardiaca congestizia e renale | Benign hypertensive heart and kidney disease with congestive heart nad renal failure    |
|                               |                             | 40490 | Cardionefropatia ipertensiva                                                  | Hypertensive heart and kidney disease                                                   |
|                               |                             | 40491 | Cardionefropatia ipertensiva con insufficienza cardiaca congestizia           | Hypertensive heart and kidney disease with congestive heart failure                     |
|                               |                             | 40492 | Cardionefropatia ipertensiva con insufficienza renale                         | Hypertensive heart and kidney disease with renal failure                                |
|                               |                             | 40493 | Cardionefropatia ipertensiva con insuf. cardiaca congestizia e renale         | Hypertensive heart and kidney disease with congestive heart and renal failure           |
|                               |                             | 40501 | Ipertensione renovascolare maligna                                            | Malignant renovascular hypertension                                                     |
|                               |                             | 40509 | Ipertensione secondaria maligna altra origine                                 | Other malignant secondary hypertension                                                  |
|                               |                             | 40511 | Ipertensione renovascolare benigna                                            | Benign renovascular hypertension                                                        |
|                               |                             | 40519 | Ipertensione secondaria benigna altra origine                                 | Other benign secondary hypertension                                                     |
|                               |                             | 40591 | Ipertensione renovascolare                                                    | Renovascular hypertension                                                               |
|                               |                             | 40599 | Ipertensione secondaria altra origine                                         | Other renovascular hypertension                                                         |
| (HYPERTENSIVE ENCEPHALOPATHY) | Hypertensive encephalopathy | 437.2 | Encefalopatia ipertensiva                                                     | Hypertensive encephalopathy                                                             |
|                               |                             | 361   | Distacco e rotture della retina                                               | Retinal detachment and tears                                                            |
|                               |                             | 361.0 | Distacco retina con rottura retinica                                          | Retinal detachment with retinal tear                                                    |

|            |                                             |        |                                                                                    |                                                                                                     |
|------------|---------------------------------------------|--------|------------------------------------------------------------------------------------|-----------------------------------------------------------------------------------------------------|
|            |                                             | 361.0  | Distacco retina regmatogeno                                                        | Rhegmatogenous retinal detachment                                                                   |
|            |                                             | 361.00 | Distacco retina con rottura retinica                                               | Retinal detachment with retinal tear                                                                |
|            |                                             | 361.01 | Recente distacco retina, parziale, con rottura singola                             | Recent retinal detachment, partial, with single tear                                                |
|            |                                             | 361.02 | Recente distacco retina, parziale, con rotture multiple                            | Recent retinal detachment, partial, with multiple tears                                             |
|            |                                             | 361.03 | Distacco recente parziale retina, con rottura gigante                              | Recent partial retinal detachment, with giant tear                                                  |
|            |                                             | 361.04 | Distacco recente parziale retina, con dialisi retinica                             | Recent partial retinal detachment, with retinal dialysis                                            |
|            |                                             | 361.05 | Distacco recente retina, totale o subtotale                                        | Recent retinal detachment, total or subtotal                                                        |
|            |                                             | 361.07 | Distacco inveterato retina, totale o subtotale                                     | Inveterate retinal detachment, total or subtotal                                                    |
|            |                                             | 361.2  | Distacco sieroso retina                                                            | Serous retinal detachment                                                                           |
|            |                                             | 361.2  | Distacco retina senza rottura retinica                                             | Retinal detachment without retinic tear                                                             |
|            |                                             | 361.9  | Distacco retinico                                                                  | Retinal detachment                                                                                  |
|            |                                             | 362    | Altre malattie della retina                                                        | Other retinal diseases                                                                              |
|            |                                             | 362.10 | Retinopatia                                                                        | Retinopathy                                                                                         |
|            |                                             | 362.11 | Retinopatia ipertensiva                                                            | Hypertensive retinopathy                                                                            |
|            |                                             | 362.11 | Retinopatia ipertensiva I° stadio                                                  | Hypertensive retinopathy, stadium I                                                                 |
|            |                                             | 362.11 | Retinopatia ipertensiva II° stadio                                                 | Hypertensive retinopathy, stadium II                                                                |
|            |                                             | 362.11 | Retinopatia ipertensiva III° stadio                                                | Hypertensive retinopathy, stadium III                                                               |
|            |                                             | 362.11 | Retinopatia ipertensiva IV° stadio                                                 | Hypertensive retinopathy, stadium IV                                                                |
| (PAST AMI) | Past episode of acute myocardial infarction | 412    | Infarto miocardico progressivo                                                     | Previous myocardial infarction                                                                      |
|            |                                             | 412    | Infarto miocardico cicatrizzato                                                    | Cicatized myocardial infarction                                                                     |
|            |                                             | 412    | Infarto miocardico progressivo diagnosticato con ECG o con altre indagini speciali | Previous myocardial infarction diagnosed with ECG or with other special investigation               |
|            |                                             | 412    | Infarto miocardico progressivo asintomatico, diagnosi ECG o altre indagini         | Previous asymptomatic myocardial infarction, diagnosed with ECG or with other special investigation |

|                                        |                                                                                   |       |                                                                                                                                                                                                                                                                    |                                                         |
|----------------------------------------|-----------------------------------------------------------------------------------|-------|--------------------------------------------------------------------------------------------------------------------------------------------------------------------------------------------------------------------------------------------------------------------|---------------------------------------------------------|
|                                        |                                                                                   | 414.8 | Altre forme specificate cardiopatia ischemica cronica                                                                                                                                                                                                              | Other specified forms of chronic ischemic heart disease |
|                                        |                                                                                   | 414.8 | Insufficienza coronarica cronica                                                                                                                                                                                                                                   | Chronic coronary insufficiency                          |
|                                        |                                                                                   | 414.8 | Ischemia miocardica cronica                                                                                                                                                                                                                                        | Chronic myocardial ischemia                             |
|                                        |                                                                                   | 414.9 | Cardiopatia ischemica cronica                                                                                                                                                                                                                                      | Chronic ischemic heart disease                          |
|                                        |                                                                                   | 414.9 | Cardiopatia ischemica                                                                                                                                                                                                                                              | Ischemic heart disease                                  |
| (VENTRICULAR DYSFUNCTION)              | Ventricular dysfunction                                                           | 402.9 | Ipertrofia Ventricolare Sinistra                                                                                                                                                                                                                                   | Left ventricular hypertrophy                            |
|                                        |                                                                                   | 428.9 | Insufficienza cardiaca 1° classe NYHA                                                                                                                                                                                                                              | Heart failure, NYHA class I                             |
| <b>Other type of subqueries</b>        |                                                                                   |       |                                                                                                                                                                                                                                                                    |                                                         |
| Name of the subquery                   | Description                                                                       |       | Detail of the subquery                                                                                                                                                                                                                                             |                                                         |
| (BP)                                   | Measurements of blood pressure above target                                       |       | Systolic blood pressure>140 at least twice ever<br><br>OR<br><br>Diastolic blood pressure >90 at least twice ever                                                                                                                                                  |                                                         |
| (CORONARY REVASCULARIZATION FREE TEXT) | Coronary revascularization recorded in notes in free text                         |       | '(%by pass%'<br><br>'%bypass%'<br><br>'%perfusion%'<br><br>'%by-pass%'<br><br>'%angioplast%'<br><br>'%rivascolariz%'<br><br>'% stent %'<br><br>'%ptca%') AND '%coronar%'                                                                                           |                                                         |
| (DM TESTS)                             | Results from plasma glucose after oral load or fasting plasma glucose or glycated |       | [plasma glucose >200mg/dl after an oral load of 75 g glucose OR fasting plasma glucose>=126 mg/dl OR glycated haemoglobin >=6.5%]<br><br>For plasma glucose two measurements above the target are necessary. (EVER). For glycated haemoglobin only one measurement |                                                         |

|           |                                                 |  |                                                                                                                 |  |
|-----------|-------------------------------------------------|--|-----------------------------------------------------------------------------------------------------------------|--|
|           | haemoglobin above target                        |  | above the target is necessary (EVER)                                                                            |  |
| (GFR)     | Glomerular filtration rate below target         |  | GFR<60                                                                                                          |  |
| (INSULIN) | Indication for insulin                          |  | At least 2 prescriptions of insulin (ATC: A10A*)                                                                |  |
| (LVEF)    | Left ventricular ejection fraction below target |  | LVEF<50% measured from echocardiography, or color Doppler echocardiography, or transesophageal echocardiography |  |
